# Supplementary material for: Effects of gas-phase and wet-chemical surface treatments on substrates induced vertical, valley–hill & micro-granular growth morphologies of close space sublimated CdTe films
Source: Royal Society of Chemistry journal article supplement (doi:10.1039/d0na00532k), 2020-01-01
Supplement: d0na00532k1.pdf [file d0na00532k1.pdf]

### Supplementary information

## Effects of Gas-phase and Wet-chemical Surface Treatments on Substrates Induced *Vertical, Valley-Hill & Micro-granular* Growth Morphologies of Close Space Sublimated CdTe Films

Kulandai Velu Ramanathan, Balakrishnan Shankar, Shantikumar V. Nair and

Mariyappan Shanmugam

| Substrates                       | Morphology                                                                         | Morphology  | Optical/Electrical Properties                                                                       | Reference |
|----------------------------------|------------------------------------------------------------------------------------|-------------|-----------------------------------------------------------------------------------------------------|-----------|
| Pristine Cu Foil                 | Platelet structural grains with pure CdTe                                          | Platelet    | Good optical absorbance with high resistance for charge carriers                                    | This work |
| HNO <sub>3</sub> treated Cu foil | Porous grains with presence of CdO and Te                                          |             | Improved light mater interaction and facilitates the charge transport                               |           |
| Plasma treated Cu foil           | Sharp distinctive edged grains with TeO <sub>2</sub> and CdO impurities            |             | Reduction in light mater interaction and defect states for smooth charge transport                  |           |
| Pristine Al foil                 | Large grains with polycrystalline CdTe                                             | Valley Hill | Wide range optical absorption with poor electrical performance                                      | This work |
| HNO <sub>3</sub> treated Al foil | Broken crystal structure due to change in surface energy with modified orientation |             | Improved optical absorption in the NIR region with high charge transport performance comparatively  |           |
| Plasma treated Al foil           | Incongruous smaller grains with strain in facets                                   |             | Improved optical absorption in the NIR region with reduction in charge transport performance        |           |
| Pristine Ni foil                 | Grains with traces of elemental Cd and Te                                          |             | Increased interaction with high energy photons with good charge transport properties                | This work |
| HNO <sub>3</sub> treated Ni foil | Change in preferred orientation of polycrystalline CdTe                            |             | Improved light mater interaction due to reduced elemental metals and resistance for charge carriers |           |

|                                             |                                                                                                   |                       |                                                                                                            |           |
|---------------------------------------------|---------------------------------------------------------------------------------------------------|-----------------------|------------------------------------------------------------------------------------------------------------|-----------|
| Plasma treated Ni foil                      | Similar morphological properties of CdTe on pristine Ni foil with presence of elemental Cd and Te |                       | Similar light mater interaction of CdTe on pristine Ni foils with high resistance in electrical properties |           |
| Pristine SS foil                            | Presence of Fe <sub>3</sub> O <sub>4</sub> giving rise allowing oxide formation                   | Chained grains        | Very good light mater interaction with high resistive charge transport                                     | This Work |
| HNO <sub>3</sub> treated SS foil            | Surface level oxides were removed due to the treatment forming pure CdTe                          |                       | Improvement in charge carriers with reduction in optical properties                                        |           |
| Plasma treated SS foil                      | Good CdTe deposition with formation of oxides                                                     |                       | Very good electrical properties with good optical absorption                                               |           |
| SS foil with Mo as contact                  | Pure phase CdTe similar to CdTe on glass Substrate                                                | Micro granular        | --                                                                                                         | 1         |
| SS foil with RF sputtered Mo                | Stress and strain of the film due to substrate temperature                                        | Micro granular        | 7% PCE with SnO <sub>2</sub> /ITO front contact                                                            | 2         |
| Polymide Upilex-S foil with Cu, Ag, Mo      | Pure phase CdTe                                                                                   | Micro granular        |                                                                                                            | 3         |
| Ni foil RF sputtered CdTe                   | Amorphous with improved crystal structure with substrate temperature                              | Micro granular        | Good optical absorption and charge carrier mobility                                                        | 4         |
| EPD CdTe on Ni foil                         | Good CdTe polycrystalline phase                                                                   | Bubble-wrap structure | Good absorption coefficient and photovoltaic characteristics                                               | 5         |
| Heat treated Cu foil with RF sputtered CdTe | Polycrystalline CdTe                                                                              | CdTe nanorods         | Varied absorption due to change in deposition time                                                         | 6         |

## References

1. V. Palekis, D. Shen, D. Hodges, S. Bhandaru, E. Stefanakos, D. L. Morel, and C. S. Ferekides. *Proc. of the 35<sup>th</sup> IEEE Photovoltaic Specialists Conference*, 2010, 001960-001963.
2. X. Feng, K. Singh, S. Bhavanam, V. Palekis, D. L. Morel, and C. S. Ferekides. *Proc. of the 38<sup>th</sup> IEEE Photovoltaic Specialists Conference*, 2012, 000843-000847.
3. K. Znajdek, M. Sibiński, A. Kubiak, Z. Lisik, and D. Janczak. *Opto-Electron. Rev.* 2019, **27**, 32-38.
4. Y. Mu, X. Zhou, H. Yao, S. Su, P. Lv, Y. Chen, J. Wang, W. Fu, W. Song, and H. Yang. *J. Alloys Compd.* 2015, **629**, 305-309.
5. J. Wang, Q. Li, Y. Mu, S. Li, L. Yang, P. Lv, S. Su, T. Liu, W. Fu, and H. Yang. *J. Alloys Compd.* 2015, **636**, 97-101.
6. E. Akbarnejad, M. Ghoranneviss, and A. Salar Elahi. *J. Inorg. Organomet. Polym Mater.* 2016, **26**, 270-275.
